# Supplementary material for: Acceptance of Mobile Health Apps for Disease Management Among People With Multiple Sclerosis: Web-Based Survey Study
Source: PubMed Central journal article supplement (PMC6334710; doi:10.2196/11977), 2018-12-12
Supplement: formative_v2i2e11977_app1.pdf [file formative_v2i2e11977_app1.pdf]

## Multimedia Appendix 1

### Questionnaire of the extended study model

#### Overview of scales and items of the conceptual study model: adapted and extended UTAUT-model

Table S1. Questionnaire for the assessment of core constructs of the conceptual study model.

| Scale  | Performance Expectancy (PE)                                                                                  | UTAUT Predictor                                                                                                                                                                  |
|--------|--------------------------------------------------------------------------------------------------------------|----------------------------------------------------------------------------------------------------------------------------------------------------------------------------------|
| Source | Original: Hennemann et al. [1]                                                                               | Adaptation in English (German)                                                                                                                                                   |
| PE1    | A Web-based aftercare could improve my work-related well-being.                                              | Using mobile MS apps could improve my general health-related well-being.<br>(Die Nutzung von MS-Apps könnte mein allgemeines gesundheitliches Wohlbefinden verbessern.)          |
| PE2    | A Web-based aftercare could help me with work-related stress                                                 | Using MS apps could help me to better deal with disease-related stress.<br>(Die Nutzung von mobilen MS-Apps könnte mir helfen, besser mit krankheitsbezogenem Stress umzugehen.) |
| PE3    | A Web-based aftercare could help me to improve my personal health.                                           | Using MS apps could help me to maintain physical mobility.<br>(Die Nutzung von MS-Apps könnte mir helfen, körperlich mobil zu bleiben.)                                          |
| PE4    | A Web-based aftercare could help me with my health problems.                                                 | Using MS apps could help me stay mentally fit.<br>(Die Nutzung von MS-Apps könnte mir helfen, geistig fit zu bleiben.)                                                           |
| PE5    | Additional item (self-constructed)                                                                           | Using MS apps could help me maintain social contacts.<br>(Die Nutzung von mobilen MS-Apps könnte mir helfen, soziale Kontakte zu pflegen.)                                       |
| Scale  | Effort Expectancy (EE)                                                                                       | UTAUT Predictor                                                                                                                                                                  |
| Source | Original: Hennemann et al. [1], Venkatesh et al. [2]                                                         | Adaptation in English (German)                                                                                                                                                   |
| EE1    | A Web-based aftercare would be easy to operate and comprehend.[1]<br>I would find the system easy to use.[2] | I suspect that using MS apps would be easy.<br>(Ich vermute, dass die Anwendung von MS-Apps leicht ist.)                                                                         |
| EE2    | I could arrange using a Web-based aftercare in my everyday life.[1]                                          | I could easily integrate the use of MS apps into my everyday life.<br>(Ich könnte die Anwendung von MS-Apps leicht in meinen Alltag integrieren.)                                |
| Scale  | Social Influence (SI)                                                                                        | UTAUT Predictor                                                                                                                                                                  |
| Source | Original: Hennemann et al. [1]                                                                               | Adaptation in English (German)                                                                                                                                                   |
|        | (---)                                                                                                        | The following people would approve it if I used MS apps:<br>(Folgende Personen würden es gut finden, wenn ich MS-Apps nutzen würde:)                                             |
| SI1    | People close to me would approve a Web-based aftercare.                                                      | Members of my family                                                                                                                                                             |

|              |                                                                                                                                          |                                                                                                                                                                                                                                                                                                                                                                                     |
|--------------|------------------------------------------------------------------------------------------------------------------------------------------|-------------------------------------------------------------------------------------------------------------------------------------------------------------------------------------------------------------------------------------------------------------------------------------------------------------------------------------------------------------------------------------|
|              |                                                                                                                                          | (Mitglieder meiner Familie)                                                                                                                                                                                                                                                                                                                                                         |
| SI2          | My general practitioner would approve the use of a Web-based aftercare.                                                                  | My general practitioner<br>(Mein mich hauptsächlich betreuender Arzt)                                                                                                                                                                                                                                                                                                               |
| SI3          | My friends would approve a Web-based aftercare.                                                                                          | My friends<br>(Meine Freunde)                                                                                                                                                                                                                                                                                                                                                       |
| <b>Scale</b> | <b>Facilitating Conditions (FC)</b>                                                                                                      | <b>UTAUT Predictor</b>                                                                                                                                                                                                                                                                                                                                                              |
| Source       | Original: Hennemann et al. [1], Venkatesh et al. [2]                                                                                     | Adaptation in English (German)                                                                                                                                                                                                                                                                                                                                                      |
| FC1          | I have the necessary technical preconditions for using a Web-based aftercare.[1]<br>I have the resources necessary to use the system.[2] | I have the necessary technical preconditions to be able to use MS apps<br>(Ich verfüge über die nötigen technischen Voraussetzungen, um MS-Apps nutzen zu können.)                                                                                                                                                                                                                  |
| FC2          | I possess the required technical knowledge to utilize a Web-based aftercare.[1]<br>I have the knowledge necessary to use the system.[2]  | I have the required technical knowledge to utilize MS apps.<br>(Ich verfüge über das notwendige technische Wissen, um MS-Apps nutzen zu können.)                                                                                                                                                                                                                                    |
| FC3          | <i>Additional item (self-constructed)</i>                                                                                                | If I had problems using MS apps, I would know where to get help.<br>(Wenn ich Probleme bei der Anwendung von MS-Apps hätte, wüsste ich, wo ich mir Hilfe holen kann.)                                                                                                                                                                                                               |
| <b>Scale</b> | <b>Behavioral intention to use MS apps (BI)</b>                                                                                          | <b>UTAUT Acceptance Criterion</b>                                                                                                                                                                                                                                                                                                                                                   |
| Source       | Original: Hennemann et al. [1] Venkatesh et al. [2]                                                                                      | Adaptation in English (German), based on the groups: User (1), Non-user (2), Previous user (3)                                                                                                                                                                                                                                                                                      |
| BI1          | I would like to try a Web-based aftercare.[1]                                                                                            | I would like to try MS apps again (1, 3)<br>(Ich würde MS-Apps noch einmal ausprobieren. (1, 3))<br>I would like to try MS apps (2)<br>(Ich würde MS-Apps gern einmal ausprobieren. (2))                                                                                                                                                                                            |
| BI2          | I would use a Web-based aftercare if offered to me.[1]                                                                                   | I would also use MS apps in the future. (1)<br>(Ich würde MS-Apps auch in der Zukunft nutzen. (1))<br>If I had the opportunity, I would use MS apps. (2)<br>(Wenn ich die Möglichkeit dazu hätte, würde ich MS-Apps nutzen. (2))<br>If I had the opportunity, I would use MS apps again. (3)<br>(Wenn ich die Möglichkeit dazu hätte, würde ich MS-Apps wieder nutzen. (3))         |
| BI3          | I intend to use the system in the next <n> months.[2]                                                                                    | I would not want to do without MS apps anymore. (1)<br>(Ich würde auf MS-Apps nicht mehr verzichten wollen. (1))<br>I intend to use MS apps in the next 4 weeks. (2)<br>(Ich beabsichtige, MS-Apps in den nächsten 4 Wochen zu nutzen. (2))<br>I intend to use MS apps again in the next 4 weeks. (3)<br>(Ich beabsichtige, MS-Apps wieder in den nächsten 4 Wochen zu nutzen. (3)) |
| <b>Scale</b> | <b>Intolerance of Uncertainty (IU)</b>                                                                                                   | <b>Extended UTAUT Predictor</b>                                                                                                                                                                                                                                                                                                                                                     |

|              |                                                                                      |                                                                                                                                                                                                                  |
|--------------|--------------------------------------------------------------------------------------|------------------------------------------------------------------------------------------------------------------------------------------------------------------------------------------------------------------|
| Source       | Original: Buhr & Dugas [3]                                                           | Adaptation and translation in German                                                                                                                                                                             |
| IU1          | When it's time to act, uncertainty paralyzes me.                                     | When it's time to act, uncertainty associated with my disease rather paralyzes me.<br><br>(Die mit meiner Erkrankung einhergehende Unsicherheit lähmt mich eher, als dass ich etwas dagegen unternehmen könnte.) |
| IU2          | My mind can't be relaxed if I don't now what will happen tomorrow.                   | <i>Not adapted, only translated</i><br><br>Es fällt mir schwer mich zu entspannen, wenn ich nicht weiß, was morgen passieren wird.                                                                               |
| IU3          | I can't stand being taken by surprise.                                               | <i>Not adapted, only translated</i><br><br>Ich kann es nicht ertragen, wenn unvorhergesehene Dinge passieren.                                                                                                    |
| IU4          | Unlike me, others seem to know where they are going with their lives.                | <i>Not adapted, only translated</i><br><br>Im Gegensatz zu mir scheinen andere Leute zu wissen, in welche Richtung ihr Leben läuft.                                                                              |
| <b>Scale</b> | <b>eHealth Literacy (eHL)</b>                                                        | <b>Extended UTAUT Predictor</b>                                                                                                                                                                                  |
| Source       | Original: Soellner et al. [4]                                                        | Adaptation in German (replacement of health information with information about MS)                                                                                                                               |
| eHL1         | Ich weiß, welche Quellen für Gesundheitsinformationen im Internet verfügbar sind.    | Ich weiß, welche Quellen für Informationen zu MS im Internet verfügbar sind.                                                                                                                                     |
| eHL2         | Ich weiß, wo im Internet ich nützliche Gesundheitsinformationen finden kann.         | Ich weiß, wo ich im Internet nützliche Informationen zu MS finden kann.                                                                                                                                          |
| eHL3         | Ich bin in der Lage, Informationen, die ich im Internet finde, kritisch zu bewerten. | Ich bin in der Lage, Informationen, die ich im Internet zu MS finde, kritisch zu bewerten.                                                                                                                       |
| eHL4         | Ich kann im Internet zuverlässige von fragwürdigen Informationen unterscheiden.      | Ich kann im Internet zuverlässige von fragwürdigen Informationen unterscheiden.                                                                                                                                  |
| <b>Scale</b> | <b>MS Self-Efficacy (MS-SE)</b>                                                      | <b>Extended UTAUT Mediator</b>                                                                                                                                                                                   |
| Source       | Original: Airlie et al. [5]                                                          | Adaptation in English (German)                                                                                                                                                                                   |
| MS-SE1       | I feel in control of my life.                                                        | Despite my MS disease, I feel in control of my life.<br><br>(Trotz meiner MS-Erkrankung glaube ich, selbst über mein Leben bestimmen zu können.)                                                                 |
| MS-SE2       | The way my MS affects me in the future mostly depends on me.                         | <i>Not adapted, only translated</i><br><br>(Es hängt zum großen Teil von mir selbst ab, wie die MS-Erkrankung mein Leben zukünftig beeinflussen wird.)                                                           |
| MS-SE3       | Despite my difficulties, I still manage to cope with daily life.                     | Despite my difficulties, I still manage to cope with daily life with MS.<br><br>(Trotz der Herausforderungen mit MS schaffe ich es, meinen Alltag zu bewältigen.)                                                |
| MS-SE4       | I am confident I can overcome my difficulties.                                       | I am confident I can overcome my daily difficulties with MS.<br><br>(Ich bin zuversichtlich, dass ich die täglichen Herausforderungen mit MS bewältigen kann.)                                                   |
| <b>Scale</b> | <b>Computer Self-Efficacy (C-SE)</b>                                                 | <b>Extended UTAUT Mediator</b>                                                                                                                                                                                   |

|              |                                                                                                   |                                                                                                                                                                                                      |
|--------------|---------------------------------------------------------------------------------------------------|------------------------------------------------------------------------------------------------------------------------------------------------------------------------------------------------------|
| Source       | Original: Wang et al. [6]                                                                         | Adaptation in English (German, replacement of computer with smartphone)                                                                                                                              |
| C-SE1        | I believe I have the ability to install new software applications on a computer.                  | I believe that I have the ability to install new apps on my smartphone.<br><br>(Ich glaube, dass ich in der Lage bin, neue Apps auf meinem Smartphone zu installieren.)                              |
| C-SE2        | I believe I have the ability to identify and correct common operational problems with a computer. | I believe I have the ability to correct technical problems with my smartphone.<br><br>(Ich glaube, dass ich in der Lage bin, technische Probleme mit meinem Smartphone zu korrigieren.)              |
| C-SE3        | I believe I have the ability to remove information from a computer that I no longer need.         | I believe I have the ability to remove apps from my smartphone I no longer need.<br><br>(Ich glaube, dass ich in der Lage bin, Apps, die ich nicht mehr benötige, von meinem Smartphone zu löschen.) |
| <b>Scale</b> | <b>Fatigue (Fat)</b>                                                                              | <b>Extended UTAUT Moderator</b>                                                                                                                                                                      |
| Source       | Original: D'Souza [7]                                                                             | Adaptation and translation in German                                                                                                                                                                 |
|              | Because of my fatigue during the past 4 weeks ...                                                 | <i>Not adapted, only translated</i><br>Aufgrund von Fatigue hatte ich in den vergangenen 4 Wochen ...(hatte ich...)                                                                                  |
| Fat1         | I have been less alert.                                                                           | Schwierigkeiten, aufmerksam zu sein.                                                                                                                                                                 |
| Fat2         | I have been limited in my ability to do things away from home.                                    | Schwierigkeiten, etwas außerhalb meines Zuhauses zu tun.                                                                                                                                             |
| Fat3         | I have had trouble maintaining physical effort for long periods.                                  | Schwierigkeiten, körperliche Anstrengung für einen längeren Zeitraum aufrechtzuerhalten.                                                                                                             |
| Fat4         | I have been less able to complete tasks that require physical effort.                             | Probleme, Aufgaben zu erfüllen, welche körperlicher Anstrengung bedürfen.                                                                                                                            |
| Fat5         | I have had trouble concentrating.                                                                 | Schwierigkeiten, mich zu konzentrieren.                                                                                                                                                              |

## References

- Hennemann S, Beutel ME, Zwerenz R. Drivers and Barriers to Acceptance of Web-Based Aftercare of Patients in Inpatient Routine Care: A Cross-Sectional Survey. *J Med Internet Res* 2016;18(12):e337. PMID:28011445
- Venkatesh, Morris, Davis. User Acceptance of Information Technology: Toward a Unified View. *MIS Quarterly* 2003;27(3):425. doi:10.2307/30036540
- Buhr K, Dugas MJ. The Intolerance of Uncertainty Scale: Psychometric properties of the English version. *Behav Res Ther* 2002;40(8):931-945. PMID:12186356
- Soellner R, Huber S, Reder M. The Concept of eHealth Literacy and Its Measurement. *Journal of Media Psychology* 2014;26(1):29-38. doi:10.1027/1864-1105/a000104
- Airlie J, Baker GA, Smith SJ, Young CA. Measuring the impact of multiple sclerosis on psychosocial functioning: The development of a new self-efficacy scale. *Clin Rehabil* 2001;15(3):259-265. PMID:11386395
- Wang D, Xu L, Chan HC. Understanding the continuance use of social network sites: A computer self-efficacy perspective. *Behaviour & Information Technology* 2014;34(2):204-216. doi:10.1080/0144929X.2014.952778
- D'Souza E. Modified Fatigue Impact Scale - 5-item version (MFIS-5). *Occup Med (Lond)* 2016;66(3):256-257. PMID:27016749
